# Supplementary material for: Major-Effect Alleles at Relatively Few Loci Underlie Distinct Vernalization and Flowering Variation in Arabidopsis Accessions
Source: PLoS One. 2011 May 20;6(5):e19949. doi: 10.1371/journal.pone.0019949 (PMC3098857; doi:10.1371/journal.pone.0019949)
Supplement: Table S1 — Markers and their alternative names used to generate the genetic maps. (XLSX) [file pone.0019949.s009.xlsx]

## Sheet: Sheet1
Table S1
Alternative names for 'cd' markers used, developed from the markers of
Nordborg et al (2005) and Clark et al (2007), by Warthmann et al (2007).
Markers used for each population are indicated.
Warthmann ID	Genaissance ID	cd ID	Lov-1 x Col	Ull-2-5x Col	Var-2-6 x Col	Edi-0 x Col	RRS-10 x Col	KNO-18 x Col
Chr_3-17381234-549	21607683	2	2	2	2	2	2	2
Chr_1-23155464-472	44607889	3	3	3	3	3	3	3
Chr_4-9376858-468	21607513	4	4	4	4	4	4
Chr_1-29897892-283	44606541	7	7		7	7	7	7
Chr_1-8384891-115	44607660	8	8	8	8	8	8	8
Chr_4-14075640-137	44607751	12	12	12	12	12	12	12
Chr_2-13471383-182	44606989	15	15
Chr_4-17257880-127	44606688	19	19			19		19
Chr_5-19414594-203	44607808	22	22		22	22		22
Chr_1-19130570-340	21607411	24	24	24	24	24	24	24
Chr_1-26992815-196	21607386	25		25			25
Chr_3-19627769-292	21607369	26	26	26	26	26	26	26
Chr_4-11877837-295	21607394	27	27	27	27	27	27	27
Chr_5-5318924-363	44607242	32	32	32	32		32
Chr_3-2967832-232	44606607	33		33
Chr_1-16874305-235	44607299	34				34	34	34
Chr_1-21079875-465	21606928	44		44	44	44	44	44
Chr_2-18752604-420	21607209	46	46	46	46	46	46	46
Chr_1-5290295-591	44606134	49	49	49	49	49	49	49
Chr_5-16259147-36	44606452	52				52	52
Chr_5-2899849-162	21607402	59	59		59
Chr_1-10641417-317	44607873	60		60	60
Chr_1-6375563-283	44606248	64	64	64	64	64	64	64
Chr_2-9653034-205	44607914	65	65	65	65	65	65	65
Chr_3-11398071-136	44607578	66		66
Chr_2-16908054-297	21607656	68	68	68	68	68	68	68
Chr_2-2270294-531	44607503	71	71	71	71	71	71	71
Chr_5-18258413-28	44607767	72	72	72	72	72	72	72
Chr_4-14935788-494	44606289	80		80	80		80
Chr_5-6221773-509	44606167	81	81	81	81		81
Chr_5-8331140-370	44607160	82			82	82
Chr_2-14696923-265	21607157	83	83	83	83	83	83	83
Chr_3-6631196-144	44606631	88	88	88	88	88	88	88
Chr_1-17252372-436	21607065	90	90	90	90
Chr_1-1042028-167	44606354	92		92
Chr_1-26849216-183	44606525	93				93
Chr_3-23053771-107	44607784	95		95		95	95	95
Chr_4-6675797-306	21607606	102	102	102			102	102
Chr_1-24190997-158	44606313	103	103			103	103
Chr_5-24996339-415	44607413	107	107	107	107	107	107	107
Chr_2-8498153-274	21607013	108	108			108	108	108
Chr_1-592464-475	44607520	111	111		111	111	111	111
Chr_2-592553-228	44606444	113	113	113		113	113	113
Chr_5-8562462-407	44607209	114	114	114				114
Chr_2-8659687-286	44606892	117		117
Chr_3-20728533-345	44607348	118	118			118
Chr_3-23411789-192	44607014	119	119		119
Chr_4-1144876-222	44608028	121	121	121	121	121	121	121
Chr_5-19315950-355	44606778	122		122
Chr_5-21318883-149	44606745	123					123
Chr_4-8177364-443	21607200	125	125	125	125	125	125	125
Chr_1-15633694-70	21607540	133	133	133	133	133	133	133
Chr_1-3678179-204	44607315	137	137	137		137	137	137
Chr_5-242093-33	44607979	139	139	139	139	139	139	139
Chr_1-27649784-395	21607030	140	140		140	140		140
Chr_2-6654153-178	21607259	141	141	141	141	141	141	141
Chr_3-5140793-101	21607175	142	142	142	142	142	142	142
Chr_1-24598020-446	44607307	143		143	143			143
Chr_4-3006871-393	44607553	151	151			151		151
Chr_5-23114998-568	44606509	152	152	152	152	152	152	152
Chr_2-4081362-424	21607005	154				154
Chr_2-11564515-275	44606802	157		157	157			157
Chr_2-8957827-491	21607488	162			162
Chr_4-4877081-394	21607327	163			163
Chr_3-9942057-314	44606908	169		169
Chr_4-4197233-423	44606216	170		170
Chr_5-1586121-562	44607234	171	171	171	171	171	171	171
Chr_5-15871814-392	44607038	172		172	172		174	172
Chr_1-9973016-272	21607165	173	173			173	173	173
Chr_3-580026-111	21607479	174	174	174	174	174		174
Chr_3-15232977-216	44606672	177					177
Chr_1-13002329-422	44608036	178			178
Chr_2-839342-464	44606322	181			181
Chr_4-5591100-313	44606680	191		191	191	191	191	191
Chr_5-3092584-262	44607857	192				192	192	192
Chr_5-3606683-122	44606151	193		193
Chr_1-11362011-213	21607548	194		194			194	194
Chr_1-20383970-298	21606980	195	195
Chr_3-2382316-156	21606963	196	196		196	196	196	196
Chr_2-4263285-62	44606598	198	198	198	198		198	198
Chr_5-3392409-67	44607054	205	205
Chr_3-11192052-138	21607496	208	208		208	208	208
Chr_3-21127342-345	44608003	216		216			216	216
Chr_3-21308958-272	21607250	218			218
Chr_1-11465886-117	44606126	219	219			219
Chr_1-3503792-467	44607429	220			220
Chr_5-4235132-36	44606159	224			224		224
Chr_3-10995480-184	44607120	228						228
Chr_3-8535266-473	21607573	231	231		231	231	231	231
Chr_2-12435063-138	44607824	238					238
Chr_3-15116441-247	44606265	239	239	239		239		239
Chr_5-13814976-264	44607709	241	241	241	241	241	241	241
Chr_1-1149096-224	44606224	246	246		246	246	246	246
Chr_1-26258979-113	21606988	249	249	249	249		249	249
Chr_4-7077771-367	21607192	253				253
Chr_3-15679305-489	44606379	254			254
Chr_4-9577993-182	44607816	263						263
Chr_5-7842900-168	44606696	265					265
